# Supplementary material
Source: publisher site journal article supplement (https://www.dovepress.com/article/392886)
Supplement: Supplementary file 2 [file get_supplementary_file.php]

**S1 Table. Relationship between items of students' understanding towards pharmaceutical care and socio-demographic characteristics categories.**

| <i>Students Understanding VS Characteristics</i>                                                                                              | <i>Category</i> | <i>Correct Answer</i> | <i>P-Value</i> |
|-----------------------------------------------------------------------------------------------------------------------------------------------|-----------------|-----------------------|----------------|
| <b>pharmaceutical care involves a defined process of activities, in which all steps must be completed to provide this service</b><br>* Gender | Male            | 79.7%                 | .012*          |
|                                                                                                                                               | Female          | 90.1%                 |                |
|                                                                                                                                               | Total           | 81.7%                 |                |
| <b>All patients who are treated with drug therapy need PC. [F]</b> * Gender                                                                   | Male            | 18.2%                 | .047*          |
|                                                                                                                                               | Female          | 27.5%                 |                |
|                                                                                                                                               | Total           | 20%                   |                |
| <b>pharmaceutical care providers need counseling rooms or other private areas to provide pharmaceutical care.</b> * Gender                    | Male            | 26.6%                 | .009*          |
|                                                                                                                                               | Female          | 14.4%                 |                |
|                                                                                                                                               | Total           | 24.3%                 |                |
| <b>The term “clinical pharmacy” can be replaced with “pharmaceutical care”. [F]</b><br>* Degree after graduation                              | B. Pharm        | 40.4%                 | 0.011*         |
|                                                                                                                                               | B.Clin.Pharm    | 64.5%                 |                |
|                                                                                                                                               | Pharm D         | 51.2%                 |                |
|                                                                                                                                               | Total           | 43.9%                 |                |
| <b>pharmaceutical care is an extension of present community pharmacy services.</b> [F] * Degree after graduation                              | B. Pharm        | 24.2%                 | 0.004*         |
|                                                                                                                                               | B.Clin.Pharm    | 33.3%                 |                |
|                                                                                                                                               | Pharm D         | 41.7%                 |                |
|                                                                                                                                               | Total           | 27.9%                 |                |

|                                                                                                                                                            |                                                                                                                               |                                                          |               |
|------------------------------------------------------------------------------------------------------------------------------------------------------------|-------------------------------------------------------------------------------------------------------------------------------|----------------------------------------------------------|---------------|
| <p><b>pharmaceutical care providers need counseling rooms or other private areas to provide pharmaceutical care. [F] *</b><br/>Degree after graduation</p> | <p>B. Pharm<br/>B.Clin.Pharm<br/>Pharm D<br/>Total</p>                                                                        | <p>27.3%<br/>25.8%<br/>10.7%<br/>24.2%</p>               | <p>0.006*</p> |
| <p><b>The primary goal of pharmaceutical care is to maintain and improve patients' quality of life. * If you Work</b></p>                                  | <p>Community pharmacy<br/>Hospital pharmacy<br/>Pharmaceutical industry<br/>Pharmaceutical marketing<br/>Others<br/>Total</p> | <p>98%<br/>100%<br/>80%<br/>100%<br/>100%<br/>98.1%</p>  | <p>.039*</p>  |
| <p><b>Carrying out pharmaceutical care necessitates drug information support. * If you Work</b></p>                                                        | <p>Community pharmacy<br/>Hospital pharmacy<br/>Pharmaceutical industry<br/>Pharmaceutical marketing<br/>Others<br/>Total</p> | <p>99%<br/>89.5%<br/>80%<br/>96%<br/>84.6%<br/>95.7%</p> | <p>.025*</p>  |
| <p><b>The term “clinical pharmacy ” can be replaced with “pharmaceutical care. {F}</b><br/>* Preferred Career</p>                                          | <p>Community pharmacy<br/>Hospital pharmacy<br/>Pharmaceutical industry<br/>Pharmaceutical marketing</p>                      | <p>46.5%<br/>45.3%<br/>32.2%<br/>54.9%</p>               | <p>.006*</p>  |

|                                                                                                                                             |                          |       |       |
|---------------------------------------------------------------------------------------------------------------------------------------------|--------------------------|-------|-------|
|                                                                                                                                             | Others                   | 36.5% |       |
|                                                                                                                                             | Total                    | 41.1% |       |
| <b>Pharmaceutical care providers need counseling rooms or other private areas to provide pharmaceutical care.</b> {F} *<br>Preferred Career | Community pharmacy       | 27.9% | .023* |
|                                                                                                                                             | Hospital pharmacy        | 15.1% |       |
|                                                                                                                                             | Pharmaceutical industry  | 19.8% |       |
|                                                                                                                                             | Pharmaceutical marketing | 33.1% |       |
|                                                                                                                                             | Others                   | 18.9% |       |
|                                                                                                                                             | Total                    | 24.6% |       |

(B. Pharm) **Bachelor of pharmacy** (B. Clin. Pharm) **Bachelor of clinical pharmacy**  
(Pharm.D) **Doctor of pharmacy**

\* Significant (<0.05)

{F} False Statement

**S2 Table. Students' attitudes towards pharmaceutical care per PCAS scale**

| <b>PCAS scale Vs characteristic</b>                   | <b>Category</b>          | <b>Mean Rank (IQR)</b> | <b>P-Value</b>     |
|-------------------------------------------------------|--------------------------|------------------------|--------------------|
| <b>Professional benefit PB Vs Current work</b>        | Yes                      | 4.5 (4.25 – 4.75)      | .001* <sup>a</sup> |
|                                                       | No                       | 4.3 (3.75 – 4.5)       |                    |
| <b>Professional duty PD Vs Current work</b>           | Yes                      | 4.5 (4 – 5 )           | .008* <sup>a</sup> |
|                                                       | No                       | 4.3 (4 – 4.5)          |                    |
| <b>Return on effort (RE) Vs Current work</b>          | Yes                      | 3( 2 – 3)              | .009* <sup>a</sup> |
|                                                       | No                       | 2.3(2 – 2.75)          |                    |
| <b>Return on effort (RE) Vs If, what type of work</b> | Community pharmacy       | 2.5 (2 – 3)            | .007* <sup>b</sup> |
|                                                       | Hospital pharmacy        | 3 (2.7 – 3.5)          |                    |
|                                                       | Pharmaceutical industry  | 2 (1.5ss – 2)          |                    |
|                                                       | Pharmaceutical marketing | 3 (2.5 – 3)            |                    |
|                                                       | Others                   | 2.5 (2 – 3.5)          |                    |

<sup>a</sup> Mann-Whitney U test

<sup>b</sup> Kruskal-Wallis test

\* Significant (<0.05)

**S3 Table. Relationship between items of students' attitudes items and socio-demographic characteristics categories.**

| <b>Attitude Vs characteristic</b>                                                                                      | <b>Category</b> | <b>Median (IQR)</b> | <b>P-value</b>     |
|------------------------------------------------------------------------------------------------------------------------|-----------------|---------------------|--------------------|
| <b>I feel that pharmaceutical care is the right direction for the profession to be headed. Vs Gender</b>               | M               | 5 (4 – 5)           | .042 <sup>*a</sup> |
|                                                                                                                        | F               | 5 (4 – 5)           |                    |
| <b>Providing pharmaceutical care is not worth the additional work load that it places on the pharmacist. Vs Gender</b> | M               | 3 (2 – 4)           | .042 <sup>*a</sup> |
|                                                                                                                        | F               | 4 (2.5 – 4)         |                    |
| <b>Pharmacists' primary responsibility should be to practice pharmaceutical care. Vs Age</b>                           | ≤ 25 years      | 4 (4 – 5)           | .042 <sup>*a</sup> |
|                                                                                                                        | > 25 years      | 4 (4 – 5)           |                    |
| <b>The primary responsibility of pharmacists in all health care settings should be to</b>                              | B. Pharm        | 4 (4 – 5)           |                    |
|                                                                                                                        | B. Clin. Pharm  | 5 (4 – 5)           |                    |

|                                                                                                                   |                                 |             |                    |
|-------------------------------------------------------------------------------------------------------------------|---------------------------------|-------------|--------------------|
| <b>prevent and solve medication-related problems. Vs Type of program</b>                                          | Pharm. D                        | 5 (4 – 5)   | .033 <sup>*b</sup> |
| <b>Providing pharmaceutical care takes too much time and effort. Vs Type of program</b>                           | B. Pharm                        | 2 (2 – 3)   | .001 <sup>*b</sup> |
|                                                                                                                   | B. Clin. Pharm                  | 2 (2 – 2.5) |                    |
|                                                                                                                   | Pharm. D                        | 2 (1 – 2)   |                    |
| <b>I feel that pharmaceutical care is the right direction for the profession to be headed. Vs Type of program</b> | B. Pharm                        | 5 (4 – 5)   | .003 <sup>*b</sup> |
|                                                                                                                   | B. Clin. Pharm                  | 4 (4 - 5 )  |                    |
|                                                                                                                   | Pharm. D                        | 5 (5 – 5)   |                    |
| <b>I feel that the pharmaceutical care movement will benefit pharmacists. Vs Type of program</b>                  | B. Pharm                        | 5 (4 – 5)   | .003 <sup>*b</sup> |
|                                                                                                                   | B. Clin. Pharm                  | 4 (4 – 5)   |                    |
|                                                                                                                   | Pharm. D                        | 5 (5 – 5)   |                    |
| <b>I feel that pharmaceutical care is the right direction for the profession to be headed. Vs Motivation</b>      | Self-motivation                 | 5 (4 – 5)   | .040 <sup>*b</sup> |
|                                                                                                                   | Force by family                 | 4 (4 – 5)   |                    |
|                                                                                                                   | Influence by friends or seniors | 5 (4 – 5)   |                    |
|                                                                                                                   | Others                          | 5 (4 – 5)   |                    |
| <b>Providing pharmaceutical</b>                                                                                   | Self-motivation                 | 3 (2 – 4)   |                    |

|                                                                                                                                 |                                 |           |                    |
|---------------------------------------------------------------------------------------------------------------------------------|---------------------------------|-----------|--------------------|
| <b>care is not worth the additional work load that it places on the pharmacist. Vs Motivation</b>                               | Force by family                 | 4 (2 – 5) | .011 <sup>*b</sup> |
|                                                                                                                                 | Influence by friends or seniors | 3 (2 – 4) |                    |
|                                                                                                                                 | Others                          | 4 (2 – 5) |                    |
| <b>Pharmacists' primary responsibility should be to practice pharmaceutical care. Vs Current employment</b>                     | Yes                             | 4 (4 – 5) | .032 <sup>*a</sup> |
|                                                                                                                                 | No                              | 4 (4 – 5) |                    |
| <b>Pharmacy students can perform pharmaceutical care during their experiential training (placements). Vs Current employment</b> | Yes                             | 4 (4 – 5) | .010 <sup>*a</sup> |
|                                                                                                                                 | No                              | 4 (3 – 4) |                    |
| <b>Providing pharmaceutical care takes too much time and effort. Vs Current employment</b>                                      | Yes                             | 2 (1 – 3) | .027 <sup>*a</sup> |
|                                                                                                                                 | No                              | 2 (2 – 3) |                    |
| <b>Providing pharmaceutical care takes too much time and effort Vs If, what type of work</b>                                    | Community pharmacy              | 2 (1 – 2) | .037 <sup>*b</sup> |
|                                                                                                                                 | Hospital pharmacy               | 2 (2 – 4) |                    |
|                                                                                                                                 | Pharmaceutical industry         | 2 (2 – 2) |                    |
|                                                                                                                                 | Pharmaceutical marketing        | 2 (2 – 4) |                    |

|                                                                                            |                          |           |                    |
|--------------------------------------------------------------------------------------------|--------------------------|-----------|--------------------|
|                                                                                            | Others                   | 2 (2 – 3) |                    |
| <b>I think the practice of pharmaceutical care is valuable Vs</b><br>If, what type of work | Community pharmacy       | 5 (4 – 5) | .037 <sup>*a</sup> |
|                                                                                            | Hospital pharmacy        | 5 (4 – 5) |                    |
|                                                                                            | Pharmaceutical industry  | 4 (4 – 4) |                    |
|                                                                                            | Pharmaceutical marketing | 4 (4 – 5) |                    |
|                                                                                            | Others                   | 4 (4 – 5) |                    |

(B. Pharm) **Bachelor of pharmacy** (B. Clin. Pharm) **Bachelor of clinical pharmacy** (Pharm.D) **Doctor of pharmacy**

<sup>a</sup> Mann-Whitney U test

<sup>b</sup> Kruskal-Wallis test

\* Significant (<0.05)
